# Supplementary material
Source: MDPI journal article supplement (https://www.mdpi.com/2297-8739/9/10/270)
Supplement: s1 [file s1 › separations-1940371-supplementary.pdf]

## Supplementary Information

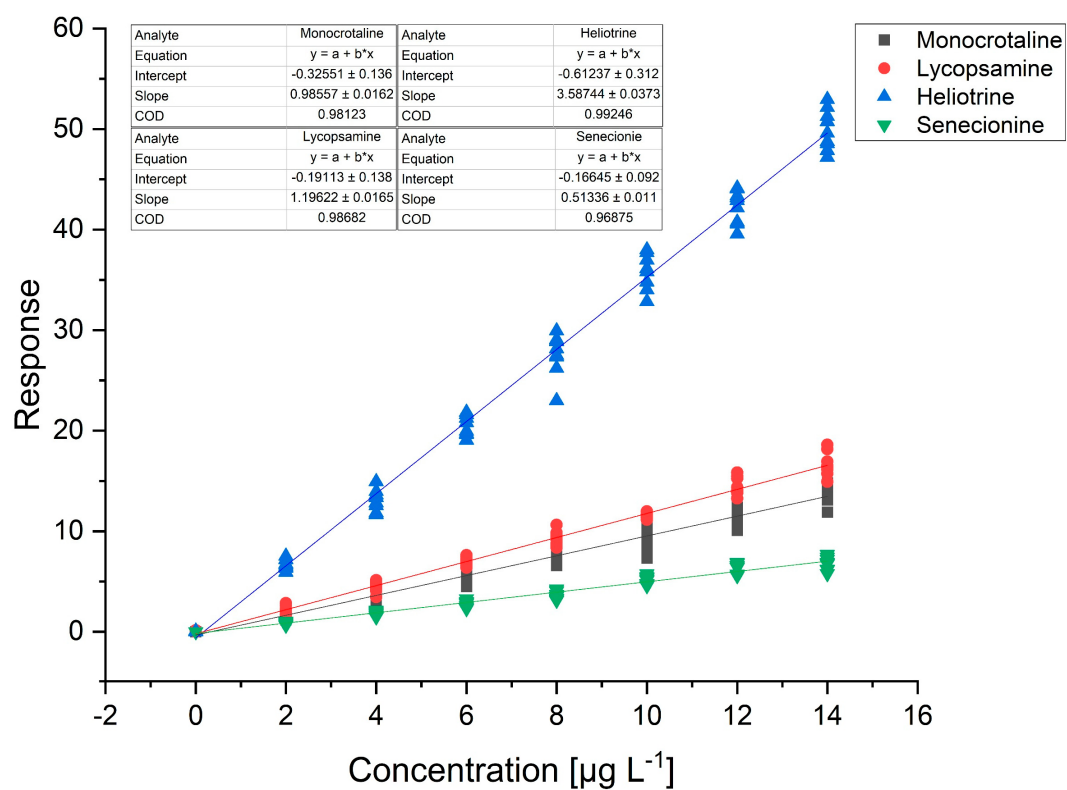

**Figure S1.** Calibration curves of the four analytes, namely monocrotaline, lycopsamine, heliotrine and senecionine.
